# Supplementary material for: Using mixed methods and partnership to develop a program evaluation toolkit for organizations that provide physical activity programs for persons with disabilities
Source: PubMed Central journal article supplement (PMC11367884; doi:10.1186/s40900-024-00618-7), 2024-09-02
Supplement: 40900_2024_618_MOESM1_ESM.pdf [file 40900_2024_618_MOESM1_ESM.pdf]

## Mixed Methods Reporting in Rehabilitation & Health Sciences (MMR-RHS)

**Instructions:** The following checklist outlines essential information for mixed methods reporting. **1) Indicate “Y” if the standard is *fully met* or “N” and additional comments if lacking. 2) Document page number where element is located.**

For more specific guidance, refer to the following linked checklists and individual journal requirements: Clinical Trials ([CONSORT](#)), Diagnostic Studies ([STARD](#)), Measurement Evaluation ([COSMIN](#)); Observational studies ([STROBE](#)); Intervention ([TIDieR](#)); Quality Improvement ([SQUIRE](#)); Qualitative ([SRQR](#)).

| Title                                                                                                                                                                                                                                                                                                                                                                                                                                                                     | Y/N;<br>Comments        |
|---------------------------------------------------------------------------------------------------------------------------------------------------------------------------------------------------------------------------------------------------------------------------------------------------------------------------------------------------------------------------------------------------------------------------------------------------------------------------|-------------------------|
| Concisely describes the topic of the study identifying the study as mixed methods                                                                                                                                                                                                                                                                                                                                                                                         |                         |
| Abstract                                                                                                                                                                                                                                                                                                                                                                                                                                                                  | Y/N;<br>Comments        |
| Summarizes key elements using <i>journal specific</i> abstract format; For example: Introduction, Methods, Results, Discussion, and Significance/potential impact to rehabilitation and/or societal health                                                                                                                                                                                                                                                                |                         |
|                                                                                                                                                                                                                                                                                                                                                                                                                                                                           | Y/N; Page #<br>Comments |
| Introduction                                                                                                                                                                                                                                                                                                                                                                                                                                                              |                         |
| Includes literature review on the topic of interest (quantitative, qualitative, and mixed)                                                                                                                                                                                                                                                                                                                                                                                |                         |
| <i>Identifies gap that justifies the need for mixed methods approach</i>                                                                                                                                                                                                                                                                                                                                                                                                  |                         |
| Clearly states overarching goal of the study that supports a mixed methods approach                                                                                                                                                                                                                                                                                                                                                                                       |                         |
| <i>States the rationale for using mixed methods research</i>                                                                                                                                                                                                                                                                                                                                                                                                              |                         |
| Clearly identifies discrete aim(s) for qualitative and quantitative components<br>Aims align with corresponding component methods                                                                                                                                                                                                                                                                                                                                         |                         |
| Provides statement of significance and potential impact                                                                                                                                                                                                                                                                                                                                                                                                                   |                         |
| Methods                                                                                                                                                                                                                                                                                                                                                                                                                                                                   |                         |
| <p><b>Design</b> – <i>Clearly describes the mixed methods design</i> (exploratory sequential, explanatory sequential, concurrent, etc.) used to accomplish the overarching goal of the project:</p> <ul style="list-style-type: none"> <li>• <i>Emphasis noted</i> (i.e., Sequential QUAL--&gt; quan or QUAN--&gt; qual; Concurrent QUAL + QUAN)</li> <li>• <i>Visual display of overall design highlighting integration</i> (e.g., model, flow chart, figure)</li> </ul> |                         |

## Mixed Methods Reporting in Rehabilitation & Health Sciences (MMR-RHS)

| Methods (continued...)                                                                                                                                                                                                                                                                                                                             | Y/N; Page #<br>Comments |
|----------------------------------------------------------------------------------------------------------------------------------------------------------------------------------------------------------------------------------------------------------------------------------------------------------------------------------------------------|-------------------------|
| Describes and supports the qualitative and quantitative methodologies (phenomenology, randomized control trial) used to accomplish the discrete aim(s) of the project                                                                                                                                                                              |                         |
| States researcher(s) background and contributions to project (e.g. content or methods expertise, relationships to participants)                                                                                                                                                                                                                    |                         |
| Identifies setting (e.g. hospital system, geographical location)                                                                                                                                                                                                                                                                                   |                         |
| <b>Subjects/Participants</b> - Clearly describes and supports the following: <ul style="list-style-type: none"> <li>• Sampling and recruitment</li> <li>• Inclusion/Exclusion criteria</li> <li>• Ethical considerations (consent process, researcher relationship with participants)</li> </ul>                                                   |                         |
| <b>Data collection</b> - Clearly describes and supports the following: <ul style="list-style-type: none"> <li>• Pilot study (if applicable)</li> <li>• Instrumentation (validity, reliability)</li> <li>• Implementation matrix (e.g. data source, timeline, type, anticipated outcomes)</li> </ul>                                                |                         |
| <b>Data analysis</b> - Clearly states and describes analysis procedures for: <ul style="list-style-type: none"> <li>• Qualitative</li> <li>• Quantitative</li> <li>• <i>Mixed Methods (integration)</i></li> </ul>                                                                                                                                 |                         |
| <b>Methodological Rigor</b> – Clearly describes steps taken to establish rigor: <ul style="list-style-type: none"> <li>• Qualitative (e.g. credibility, dependability, confirmability, transferability)</li> <li>• Quantitative (e.g. validity, reliability, generalizability)</li> <li>• <i>Mixed Methods</i> (validity or legitimacy)</li> </ul> |                         |
| <b>Results/Findings</b>                                                                                                                                                                                                                                                                                                                            |                         |
| Clearly presents findings for study components: <ul style="list-style-type: none"> <li>• Qualitative (includes data exemplars)</li> <li>• Quantitative</li> <li>• <i>Mixed Methods-Provides integrated findings/overall study results</i> (e.g., joint display)</li> </ul>                                                                         |                         |
| <b>Discussion</b>                                                                                                                                                                                                                                                                                                                                  |                         |
| <ul style="list-style-type: none"> <li>• <i>Incorporates discussion on implications of integrated findings</i></li> </ul>                                                                                                                                                                                                                          |                         |
| <ul style="list-style-type: none"> <li>• Provides synthesis and interpretation of findings in the context of existing literature and theoretical/conceptual framework</li> </ul>                                                                                                                                                                   |                         |
| <ul style="list-style-type: none"> <li>• Includes subsection of limitations</li> </ul>                                                                                                                                                                                                                                                             |                         |
